# Supplementary material for: Ni(OH)2-modified SrTiO3 for enhanced photocatalytic hydrogen evolution reactions
Source: Royal Society of Chemistry journal article supplement (doi:10.1039/d0nj00771d), 2020-01-01
Supplement: d0nj00771d1.pdf [file d0nj00771d1.pdf]

## Supplementary Materials

### Ni(OH)<sub>2</sub>-Modified SrTiO<sub>3</sub> for Enhanced Photocatalytic Hydrogen Evolution Reaction

Wenqian Chen<sup>a,c,#</sup>, Meiqi Zhang<sup>a,#</sup>, Shaohua Yang<sup>a</sup>, Jinyi Chen<sup>a</sup>, Liang Tang<sup>a,b,\*</sup>

<sup>a</sup> School of Environmental and Chemical Engineering, Shanghai University, Shanghai  
200444, PR China

<sup>b</sup> Key Laboratory of Organic Compound Pollution Control Engineering, Ministry of  
Education, Shanghai 200444, PR China

<sup>c</sup> Shanghai Institute of Applied Radiation, Shanghai University, 20 Chengzhong Road,  
Shanghai 201800, PR China

\* Corresponding author. E-mail addresses: tang1liang@shu.edu.cn (L. Tang)

# Equal contribution

**Table. S1. Physicochemical properties of SrTiO<sub>3</sub>, Ni(OH)<sub>2</sub>/SrTiO<sub>3</sub> and Ni(OH)<sub>2</sub> samples.**

| Samples | R   | Ni(OH) <sub>2</sub> (mol%)<br>(ICP-OES) | S <sub>BET</sub><br>(m <sup>2</sup> g <sup>-1</sup> ) | Pore volume<br>(cm <sup>3</sup> g <sup>-1</sup> ) |
|---------|-----|-----------------------------------------|-------------------------------------------------------|---------------------------------------------------|
| N0      | 0   | 0                                       | 3.2844                                                | 0.0218                                            |
| N0.5    | 0.5 | 0.376                                   | 3.7696                                                | 0.0189                                            |
| N5      | 5   | 4.73                                    | 14.8100                                               | 0.0512                                            |
| N10     | 10  | 8.05                                    | 46.8466                                               | 0.1099                                            |
| N20     | 20  | 18.96                                   | 52.6024                                               | 0.1245                                            |
| N25     | 25  | 23.68                                   | 67.2800                                               | 0.1678                                            |
| N100    | 100 | 100                                     | 357.7338                                              | 0.6153                                            |

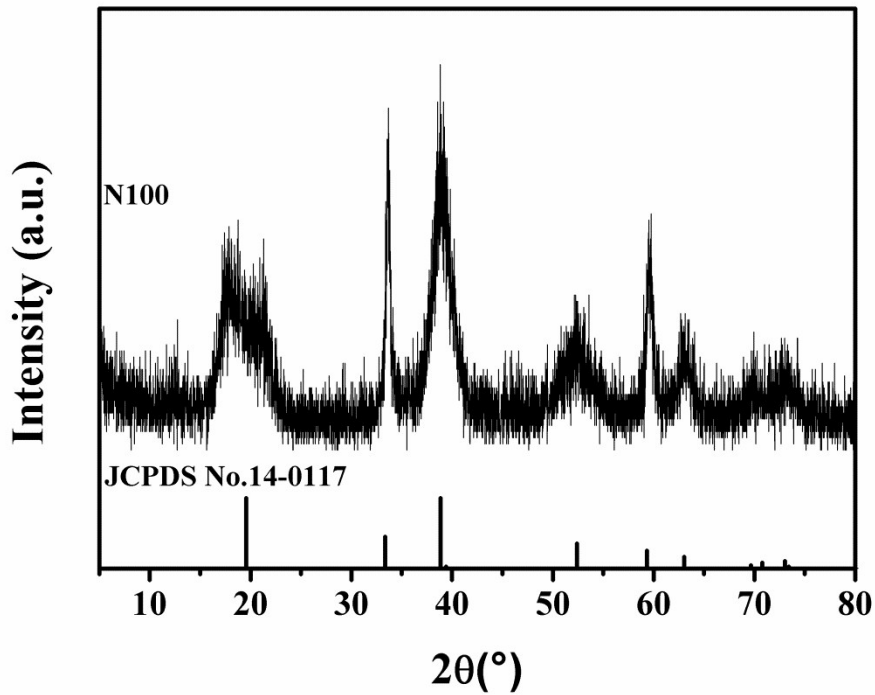

**Fig. S1.** XRD patterns of sample N100 and Ni(OH)<sub>2</sub> (JCPDS No.14-0117).

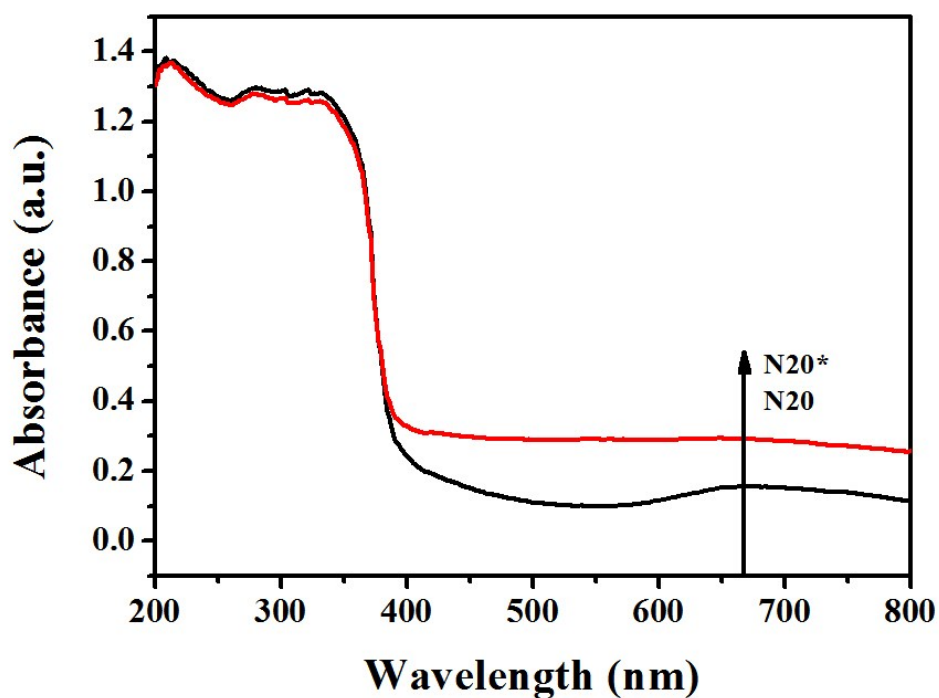

**Fig. S2.** UV-vis diffuse reflectance spectra of N20 and N20\* (after 3 hours of hydrogen production).

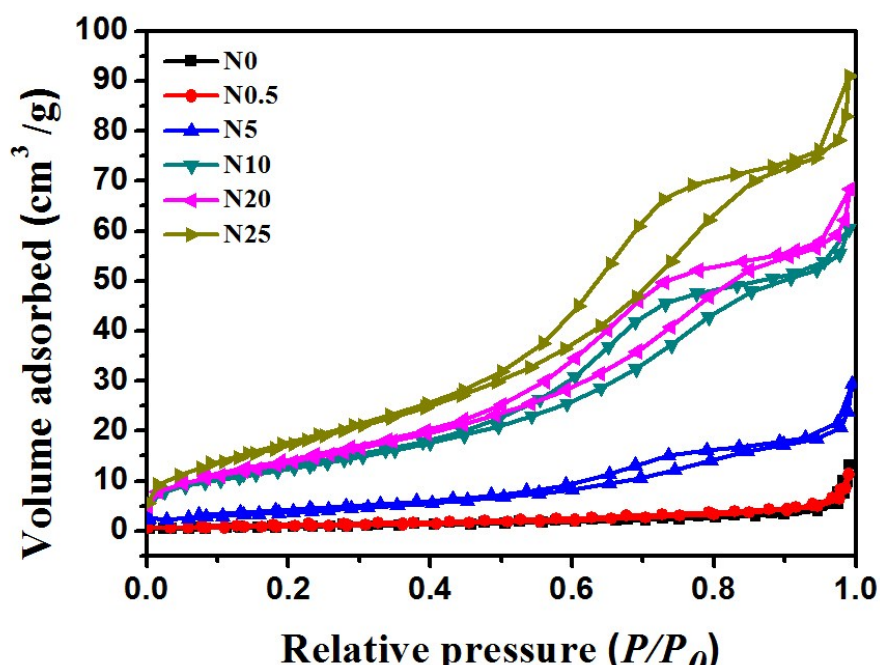

**Fig. S3.** Nitrogen adsorption-desorption isotherms of samples N0, N0.5, N5, N10, N20, N25, N100.

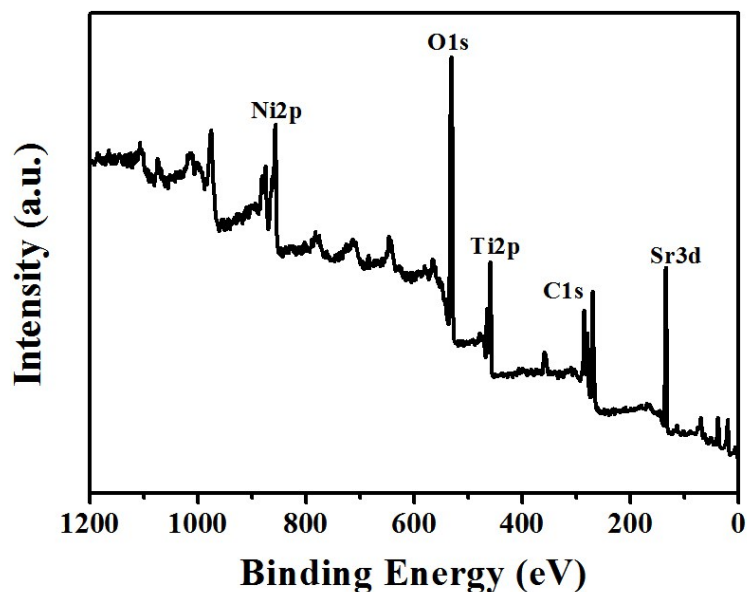

**Fig. S4.** The XPS survey spectrum of N20.

The XPS survey spectrum of N20 indicates that Sr, Ti, Ni, O, and C elements are observed and their corresponding photoelectron peaks appear at the binding energies of 130 eV (Sr 3d), 458 eV (Ti 2p), 856 eV (Ni 2p), 531 eV (O 1s), and 286 eV (C 1s), respectively. The carbon peak is attributed to the residual carbon from the sample and adventitious hydrocarbon from the XPS instrument itself.

**Table S2** Comparative results of hydrogen production rate from the photocatalytic water splitting over various SrTiO<sub>3</sub>-based photocatalysts.

| Photocatalyst                                    | Scavenger | Reaction conditions                                                                                                                              | Light source     | H <sub>2</sub> production rate                | References |
|--------------------------------------------------|-----------|--------------------------------------------------------------------------------------------------------------------------------------------------|------------------|-----------------------------------------------|------------|
| 20 mol.% Ni(OH) <sub>2</sub> /SrTiO <sub>3</sub> | MeOH      | 0.025 g of photocatalyst, 40 ml of 25 vol.% aqueous MeOH solution                                                                                | 300 W UV Xe lamp | 1461.7 (μmolh <sup>-1</sup> g <sup>-1</sup> ) | This work  |
| 0.5 wt.% Cu-SrTiO <sub>3</sub>                   | MeOH      | 0.15 g of photocatalyst, 38ml MeOH and 342ml water. H <sub>2</sub> PtCl <sub>6</sub> ·6H <sub>2</sub> O (183 μl, c = 62.6 mmol L <sup>-1</sup> ) | 300 W Hg lamp    | 800 (μmolh <sup>-1</sup> g <sup>-1</sup> )    | 1          |

|                                                                 |                                 |                                                                                    |                                               |                                                               |   |
|-----------------------------------------------------------------|---------------------------------|------------------------------------------------------------------------------------|-----------------------------------------------|---------------------------------------------------------------|---|
| SrTiO <sub>3</sub> -TiO <sub>2</sub>                            | MeOH                            | -                                                                                  | 300 W Xe lamp                                 | 314.9 (μmolcm <sup>-2</sup> h <sup>-1</sup> )                 | 2 |
| Pt (0.5 wt.%) SrTiO <sub>3</sub> : Rh (1 mol%)                  | MeOH                            | 0.05 g of photocatalyst, 50ml of 20 vol.% aqueous MeOH solution                    | 300 W Xe lamp (λ > 420 nm)                    | 962 (μmol h <sup>-1</sup> g <sup>-1</sup> )                   | 3 |
| 1% Rh-doped 0.1 wt.% Pt-loaded SrTiO <sub>3</sub>               | MeOH                            | 0.3 g of photocatalyst, 150 ml of 10 vol.% aqueous MeOH solution                   | 300 W Xe lamp with cutoff filter (λ > 440 nm) | 117 (μmolh <sup>-1</sup> g <sup>-1</sup> cat <sup>-1</sup> )  | 4 |
| 4 mol% Cr-, 4 mol% Ta-doped 1 wt.% Pt loaded SrTiO <sub>3</sub> | MeOH                            | 1 g of photocatalyst, 310 ml of 6.5 vol.% aqueous MeOH solution                    | 300 W Xe lamp with cutoff filter (λ > 440 nm) | 70 (μmolh <sup>-1</sup> g <sup>-1</sup> cat <sup>-1</sup> )   | 5 |
| CdS/SrTiO <sub>3</sub> 3wt%                                     | MeOH                            | -                                                                                  | 310 W/m <sup>2</sup> , XHA500                 | 169 (μmol h <sup>-1</sup> g <sup>-1</sup> )                   | 6 |
| 950°C, 1% Zn doped 0.2% (w%) CoO/SrTiO <sub>3</sub>             | Na <sub>2</sub> CO <sub>3</sub> | 0.1 g of photocatalyst, 800 ml of aqueous Na <sub>2</sub> CO <sub>3</sub> solution | 400 W Hg lamp                                 | 315 (μmol h <sup>-1</sup> g <sup>-1</sup> )                   | 7 |
| 1 wt.% Au-loaded mesoporous assembled SrTiO <sub>3</sub>        | CHOOH                           | 0.2 g of photocatalyst, 200 ml of 2.5 vol.% aqueous CHOOH solution                 | 176 W Hg lamp                                 | 647 (μmol h <sup>-1</sup> g <sup>-1</sup> cat <sup>-1</sup> ) | 8 |

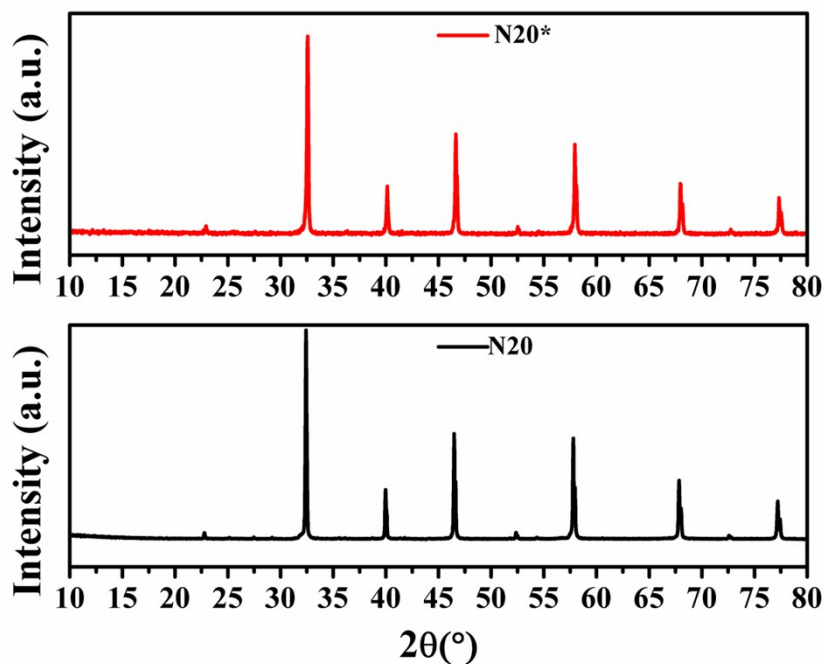

**Fig. S5.** XRD patterns of samples N20 and N20\* (after 3 hours of hydrogen production)

The XRD patterns of the sample after 3 hours of photocatalytic hydrogen production and N20 (before the reaction) to further prove the stability of the sample.

## Reference

1. S. Banakhojasteh, S. Beckert and R. Gläser, *J. Photoch. Photobio. A*, 2018, **366**, 48-54.
2. Z. Wu, Y. Su, J. Yu, W. Xiao, L. Sun and C. Lin, *Int. J. Hydrogen Energy*, 2015, **40**, 9704-9712.
3. P. Shen, J. C. Lofaro, W. R. Woerner, M. G. White, D. Su and A. Orlov, *Chem. Eng. J.*, 2013, **223**, 200-208.
4. T. Ishii, H. Kato and A. Kudo, *J. Photoch. Photobio. A*, 2004, **163**, 181-186.
5. R. Konta, T. Ishii, H. Kato, A. Kudo, *J. Physl. Chem. B*, 2004, **108**, 8992-8995.
6. E.-C. Su, J.-M. Yeh, B.-S. Huang, J.-T. Lee and M.-Y. Wey, *Sol. Energy*, 2017, **147**, 240-247.
7. G.-y. Wang, Y. Qin, J. Cheng and Y.-j. Wang, *J. Fuel Chem. & Technol.*, 2010, **38**, 502-507.
8. T. Puangpetch, S. Chavadej and T. Sreethawong, *Energ. Convers. Manage.*, 2011, **52**, 2256-2261.
